# Supplementary material for: Oxidative degradation of toxic organic pollutants by water soluble nonheme iron(iv)-oxo complexes of polydentate nitrogen donor ligands
Source: Royal Society of Chemistry journal article supplement (doi:10.1039/d0dt04421k), 2021-01-01
Supplement: d0dt04421k2.pdf [file d0dt04421k2.pdf]

*Electronic Supplementary Information (ESI)*

*for*

**Oxidative Degradation of Toxic Organic Pollutants by Water Soluble Nonheme  
Iron(IV)-Oxo Complexes of Polydentate Nitrogen Donor Ligands**

*Sandip Munshi, Rahul Dev Jana and Tapan Kanti Paine\**

School of Chemical Sciences, Indian Association for the Cultivation of Science,  
2A & 2B Raja S. C. Mullick Road, Jadavpur, Kolkata-700032, India

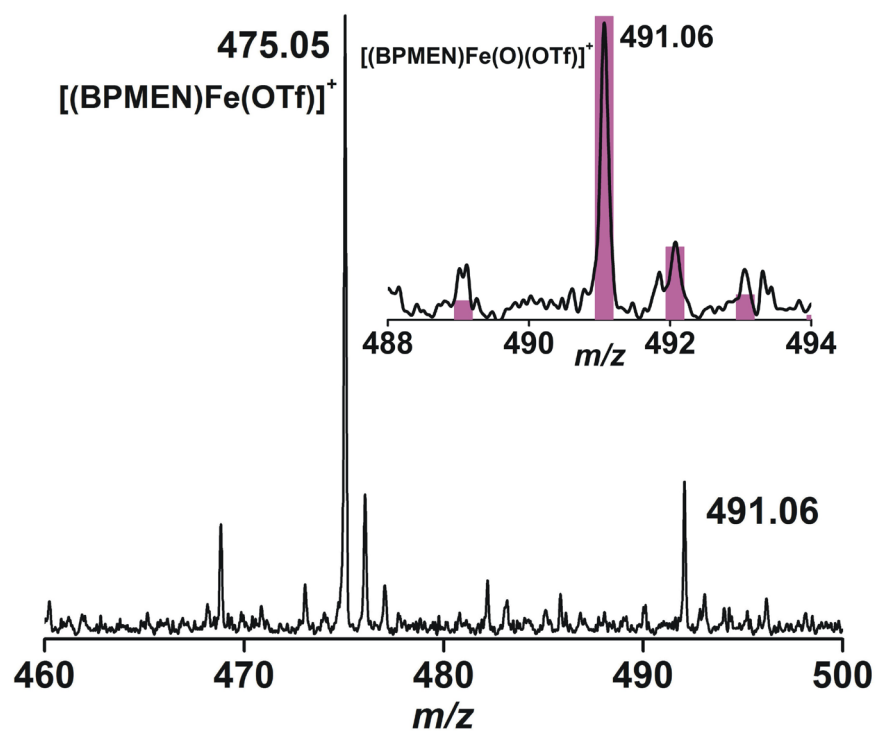

**Fig. S1** ESI-mass spectrum (positive ion mode in water) of 1.

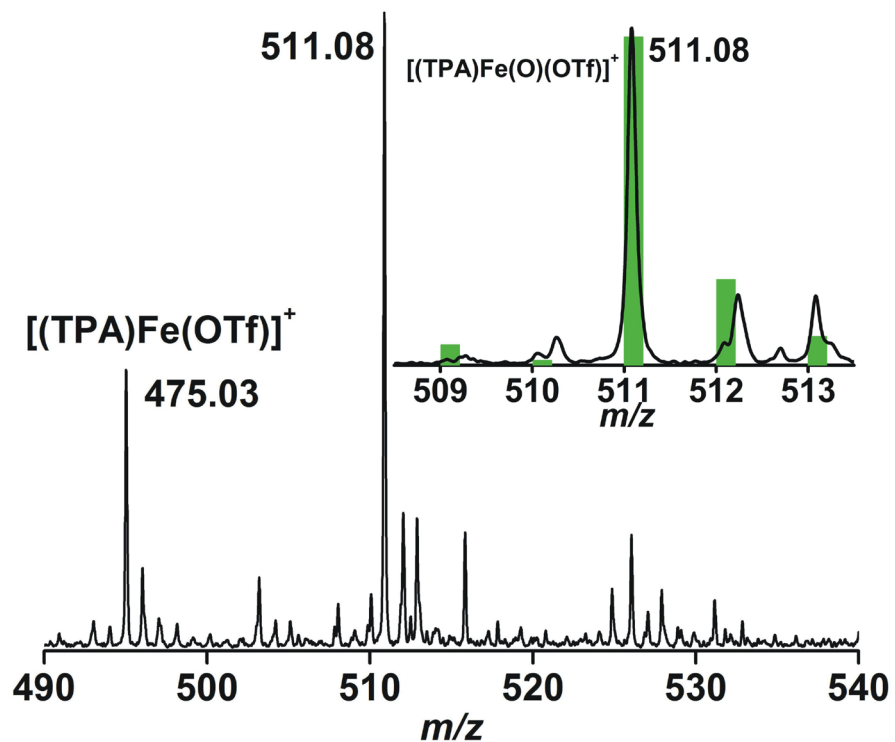

**Fig. S2** ESI-mass spectrum (positive ion mode in water) of 2.

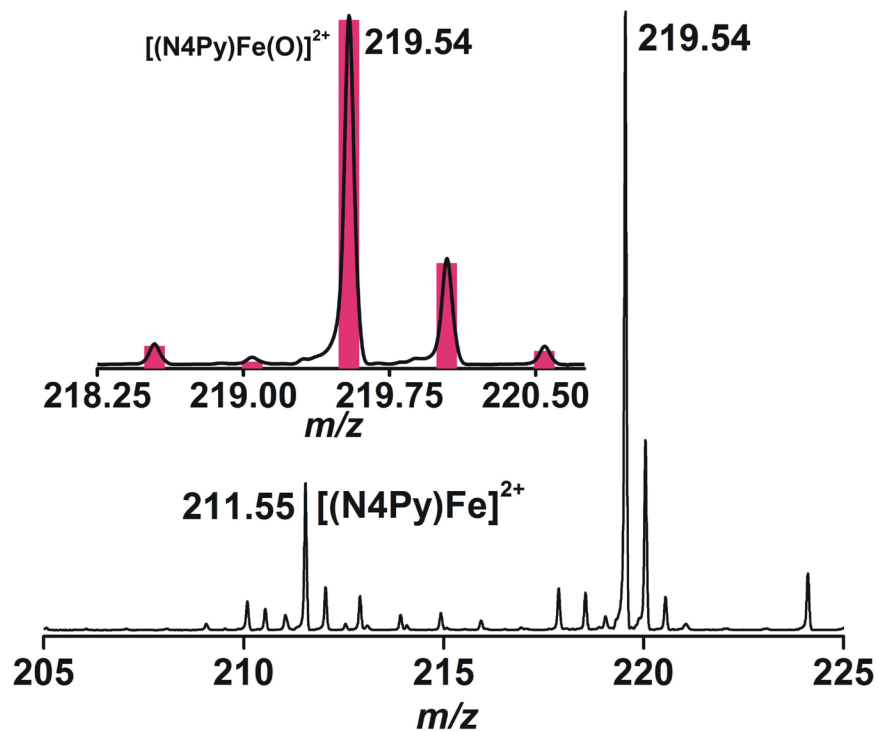

**Fig. S3** ESI-mass spectrum (positive ion mode in water) of 3.

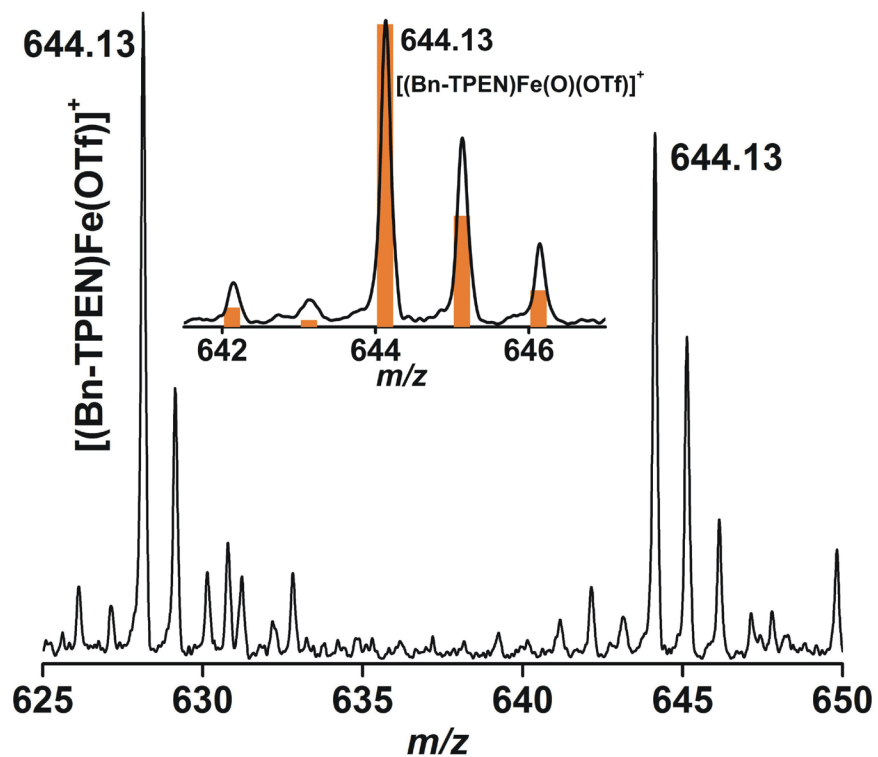

**Fig. S4** ESI-mass spectrum (positive ion mode in water) of 4.

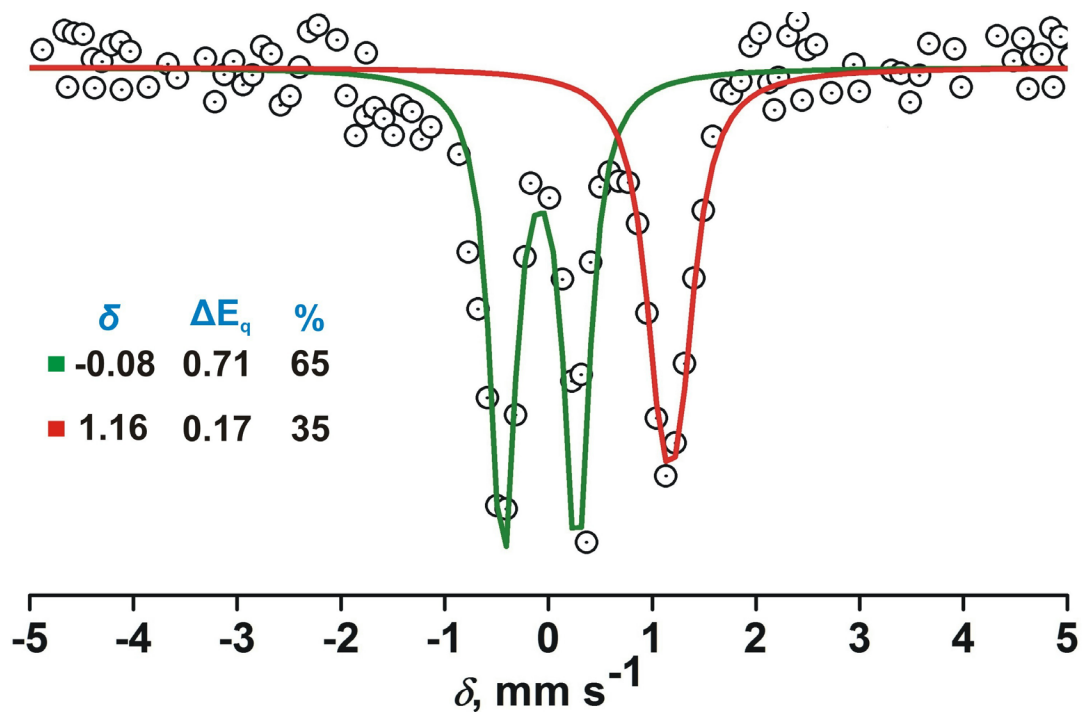

**Fig. S5** Zero-field  $^{57}\text{Fe}$  Mössbauer spectrum of the frozen sample of complex **4** at 77 K. Simulation shows the presence of an iron(IV)-oxo species (65%) and the starting iron (II) complex (35%) in the sample used for data collection.

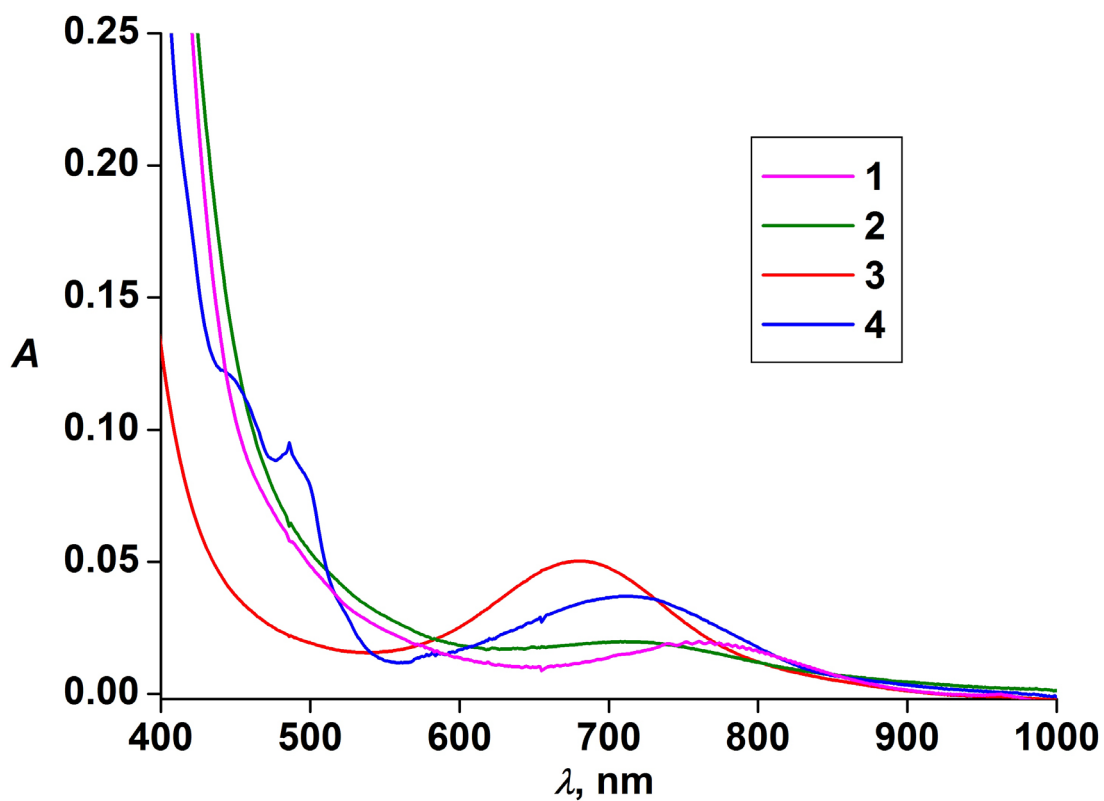

**Fig. S6** Optical spectra of the iron(IV)-oxo species (**1-4**) generated by oxone (0.25 mM in water at 298 K).

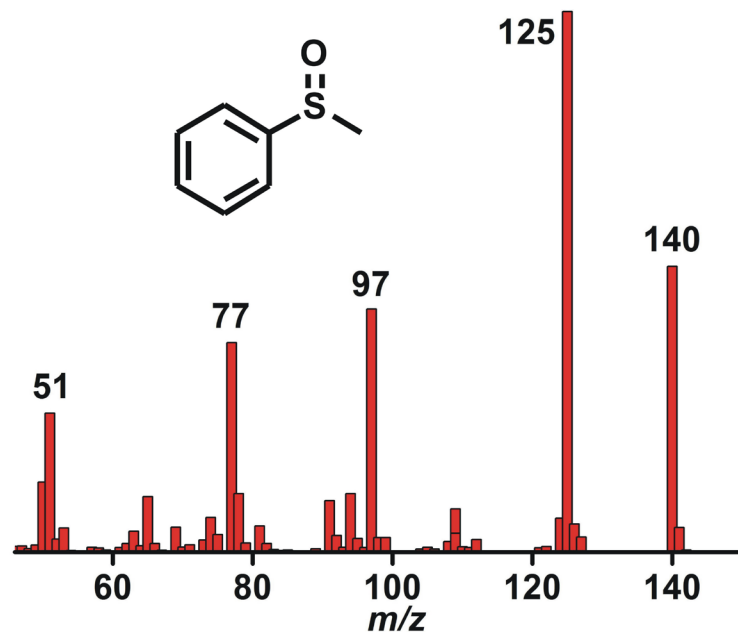

**Fig. S7** GC-mass spectrum of thioanisole oxide formed in the reaction of iron(IV)-oxo species (1) with thioanisole (10 equiv.).

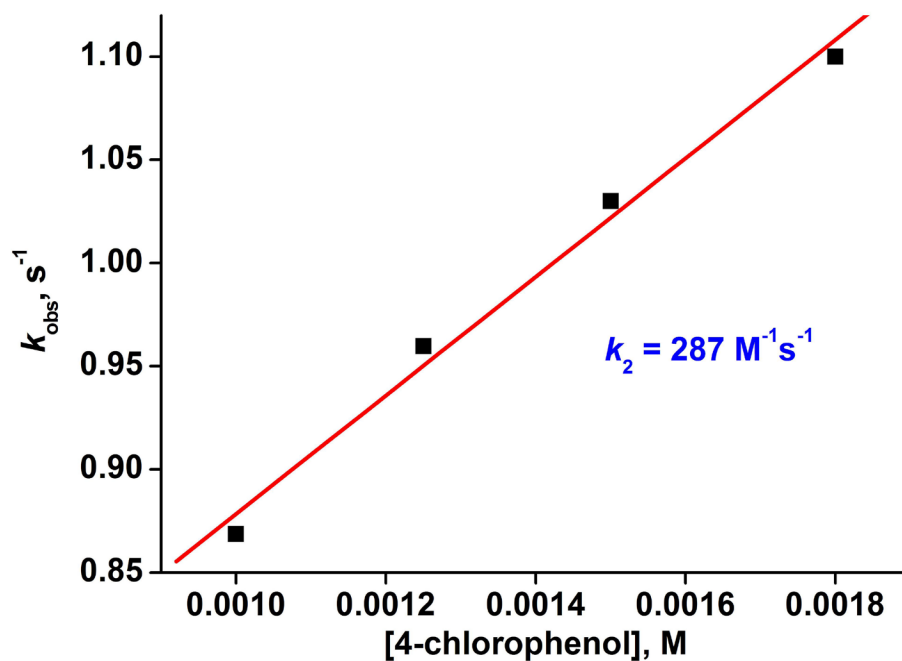

**Fig. S8** Second order rate constant for 4-chlorophenol oxidation by 2.

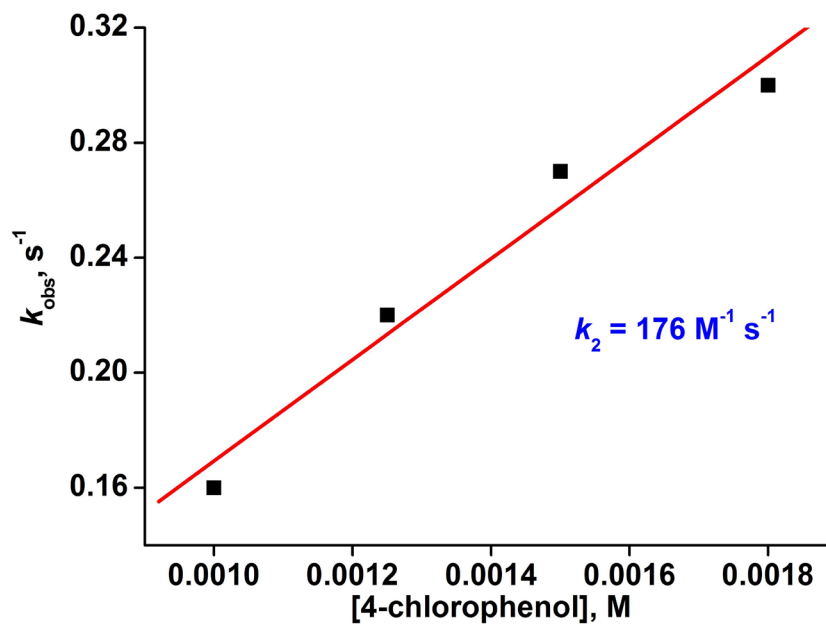

**Fig. S9** Second order rate constant for 4-chlorophenol oxidation by 3.

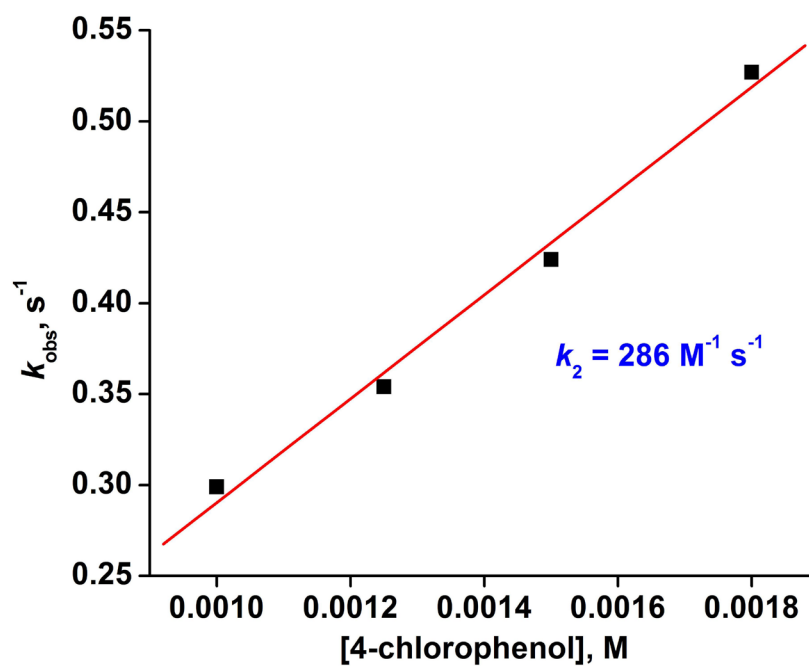

**Fig. S10** Second order rate constant for 4-chlorophenol oxidation by 4.

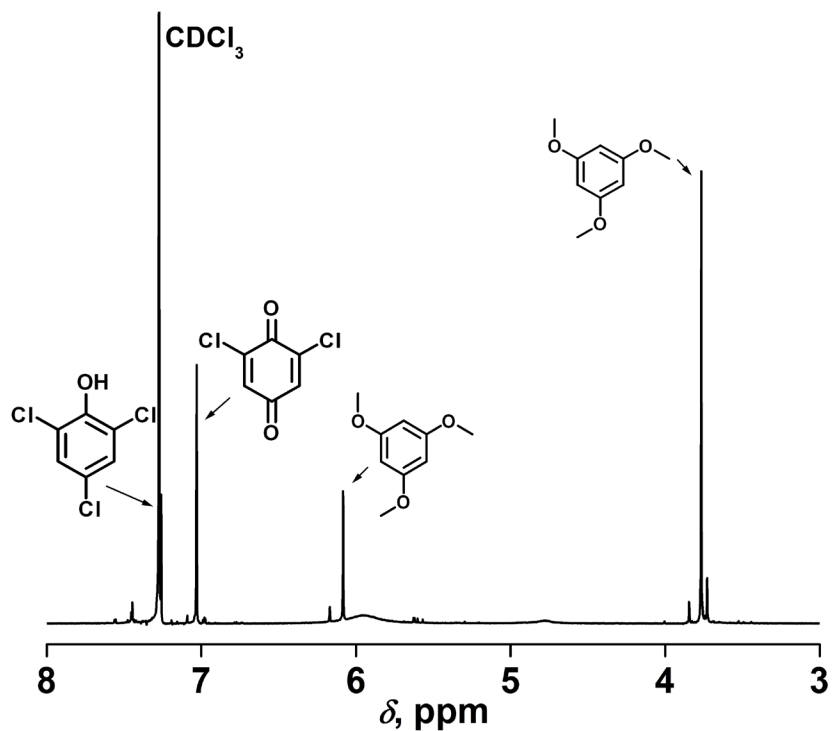

**Fig. S11** <sup>1</sup>H NMR (300 MHz, CDCl<sub>3</sub>, 298 K) spectrum of organic product formed in the reaction of 2,4,6-trichlorophenol (10 equiv.) with **1**.

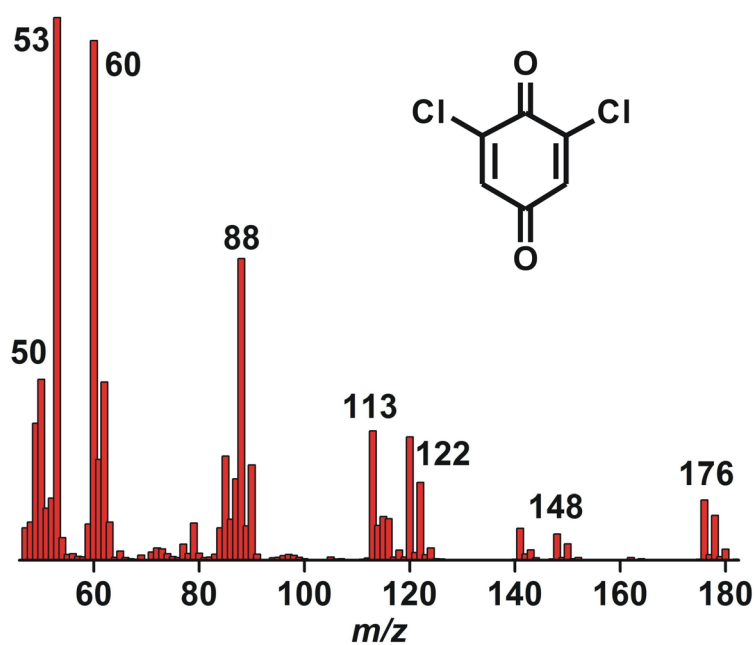

**Fig. S12** GC-mass spectrum of 2,6-dichloro-*p*-benzoquinone formed in the reaction of **3** with 2,4,6-trichlorophenol (10 equiv.).

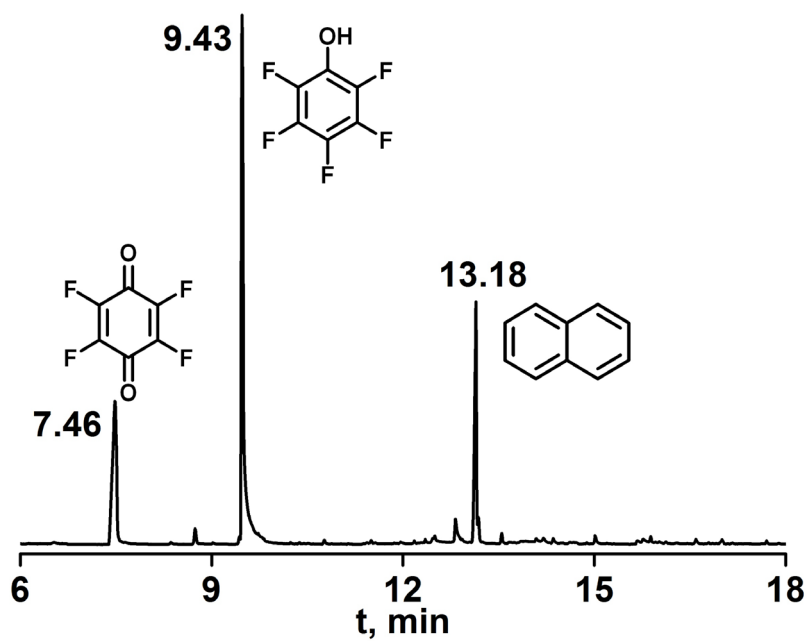

**Fig. S13** GC chromatogram of 2,3,5,6-tetrafluoro-*p*-benzoquinone obtained in the reaction of **4** with pentafluorophenol (10 equiv.).

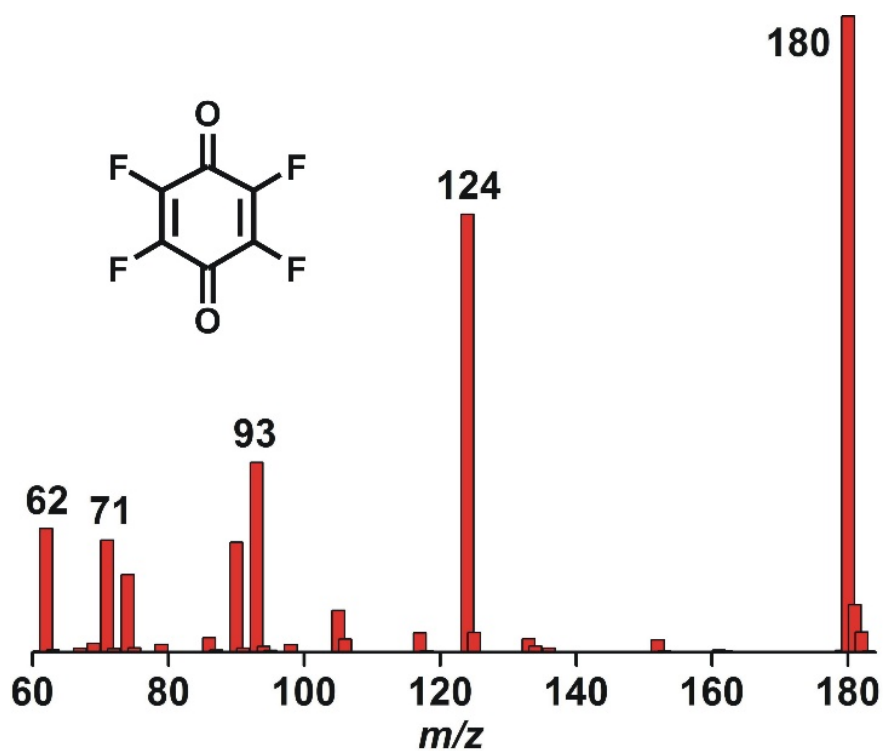

**Fig. S14** GC-mass spectrum of 2,3,5,6-tetrafluoro-*p*-benzoquinone formed in the reaction of **4** with pentafluorophenol (10 equiv.).



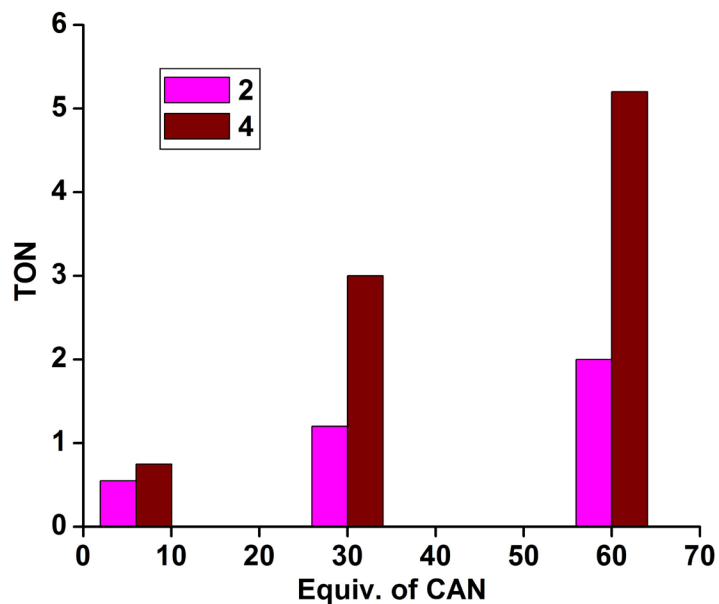

**Fig. S15** TON of 2,3,5,6-tetrafluoro-*p*-benzoquinone derived from pentafluorophenol oxidation by **2** and **4** in the presence of CAN (60 equiv).

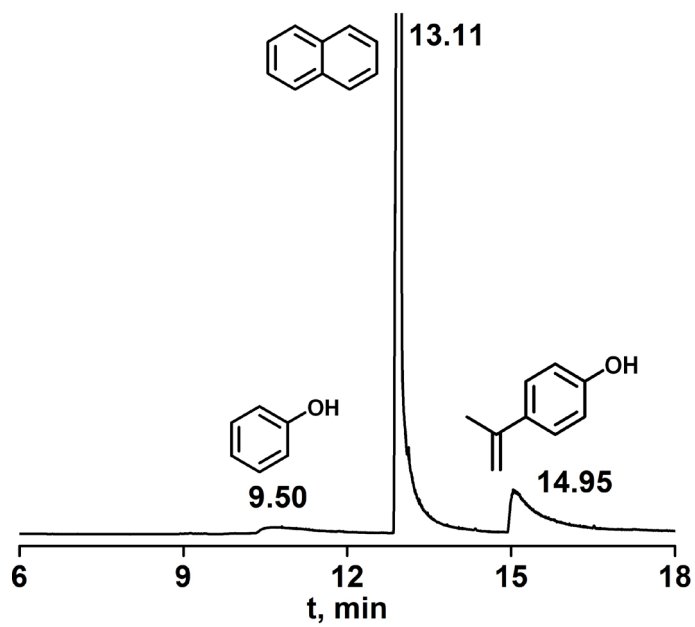

**Fig. S16** GC chromatogram of phenols obtained in the oxidation of Bisphenol A (10 equiv.) by **3**.

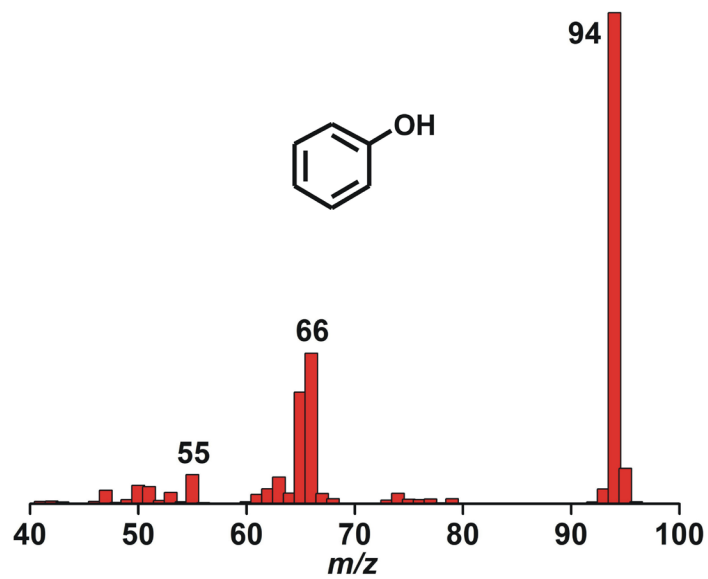

**Fig. S17** GC-mass spectrum of phenol formed in the reaction of **3** with Bisphenol A (10 equiv.).

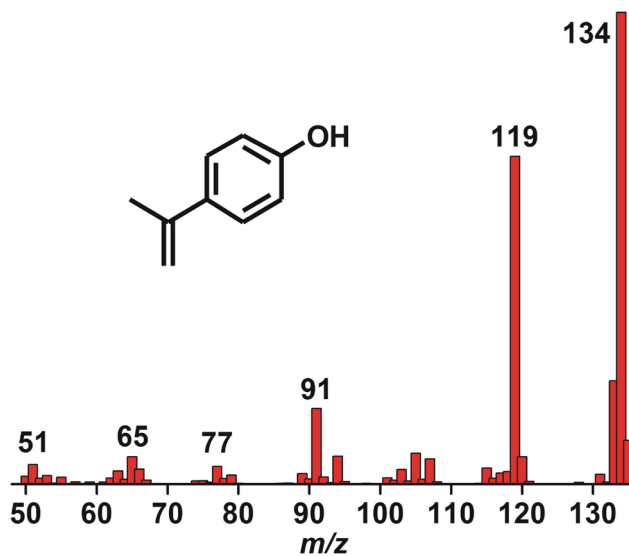

**Fig. S18** GC-mass spectrum of *p*-isopropenylphenol formed in the reaction of **3** with Bisphenol A (10 equiv.).

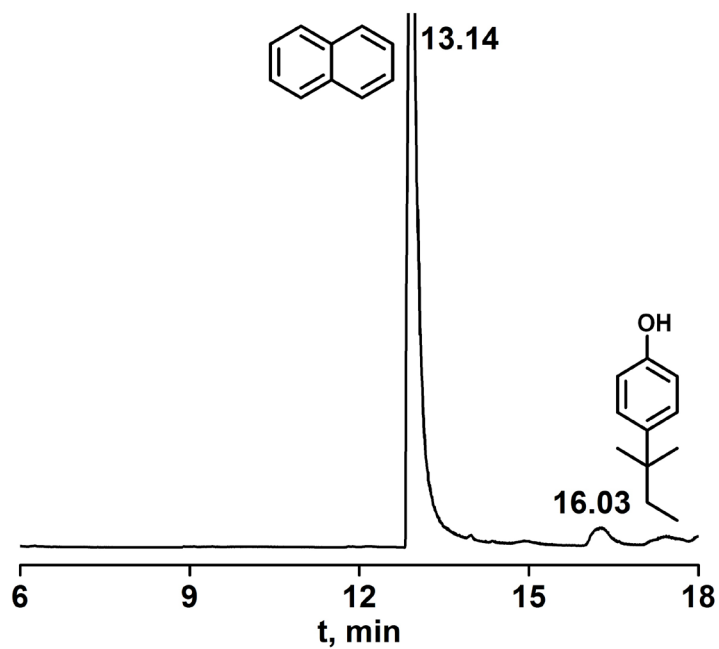

**Fig. S19** GC chromatogram of products obtained in the oxidation of nonylphenol (10 equiv.) by **2**.

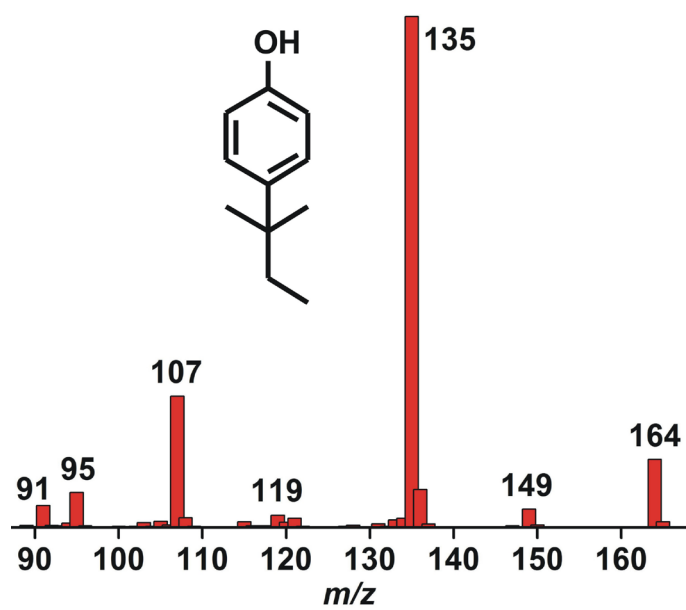

**Fig. S20** GC-mass spectrum of *p*-dimethylpropylphenol formed in the reaction of **2** with nonylphenol (10 equiv.).

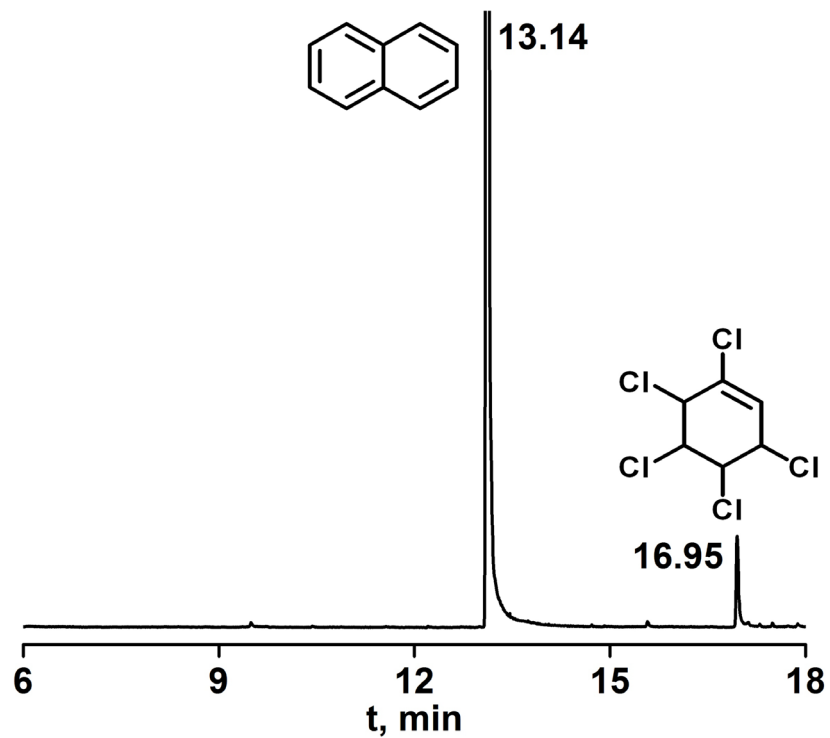

**Fig. S21** GC chromatogram of pentachlorocyclohexene obtained in the oxidation of lindane (10 equiv.) by **1**.

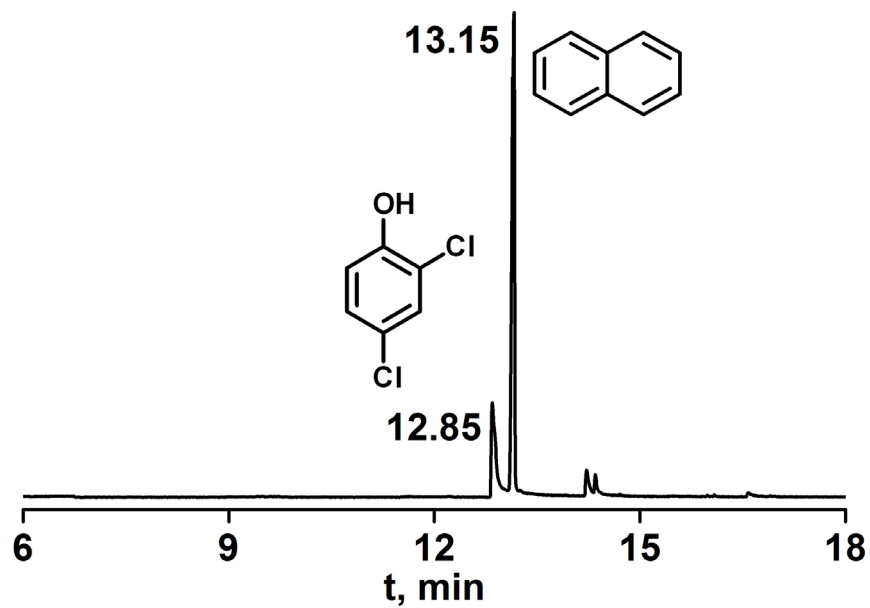

**Fig. S22** GC chromatogram of 2,4-dichlorophenol obtained in the oxidation of 2,4-dichlorophenoxyacetic acid (10 equiv.) by **1**.

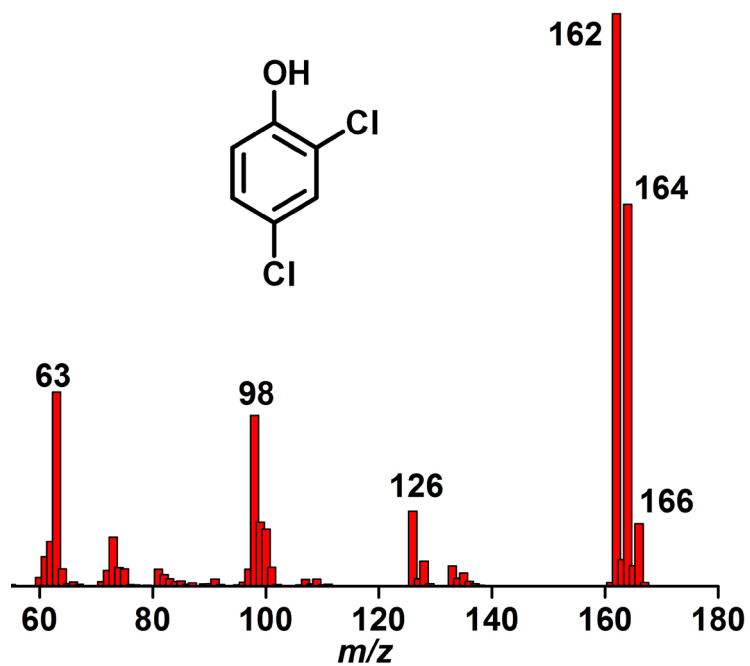

**Fig. S23** GC-mass spectrum of 2,4-dichlorophenol formed in the reaction of **1** with 2,4-dichlorophenoxyacetic acid (10 equiv.).

.....
